# Supplementary material
Source: Springer Nature journal article supplement (https://www.springermedizin.de/resource/supplementary/13023_2012_549_MOESM1_ESM.pdf/9642746)
Supplement: MOESM1 [file 9642746]

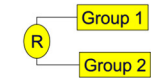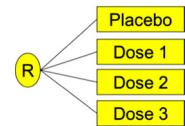

A: parallel groups

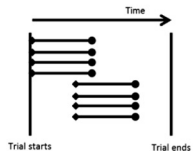

E: randomised placebo phase

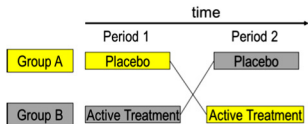

B: cross-over

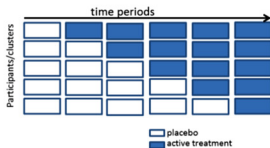

F: stepped wedge

Comparison: A vs placebo

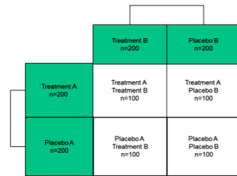

C: factorial

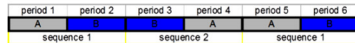

D: N-of-1

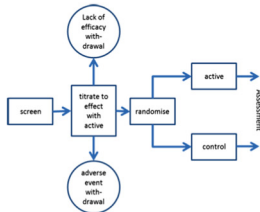

G: randomised withdrawal
